# Supplementary material
Source: PubMed Central journal article supplement (PMC1373712)
Supplement: cmaj_174_3_313__1.pdf [file cmaj_174_3_313__1.pdf]

**Appendix 1:** Baseline characteristics of participating family physicians\* (*n* = 21)

| Characteristic                                                  | no. (%)† |
|-----------------------------------------------------------------|----------|
| Male                                                            | 18 (86)  |
| Age, mean (SD), yr                                              | 54 (7)   |
| Experience with computer                                        |          |
| Not at all                                                      | 3 (14)   |
| A little                                                        | 2 (9)    |
| Moderate                                                        | 13 (62)  |
| Very much                                                       | 3 (14)   |
| Communication from ED                                           |          |
| Summaries received by mail                                      | 20 (95)  |
| Summaries received by mail within 1–2 wk of patient visit to ED | 9 (43)   |
| Practice characteristics                                        |          |
| Solo                                                            | 12 (57)  |
| Group                                                           | 9 (43)   |
| No. of patients, mean                                           | 4184     |
| Duration of practice, mean (SD), yr                             | 24 (6)   |
| Proportion of patients currently followed by specialist, mean   | 39%      |
| Proportion of patients with chronic medical conditions, mean    | 49%      |
| Proportions of patients by age ranges, mean, yr                 |          |
| < 40                                                            | 27%      |
| 40–69                                                           | 40%      |
| 70–79                                                           | 22%      |
| ≥ 80                                                            | 11%      |

Note: SD = standard deviation, ED = emergency department.

\*Two physicians did not answer the baseline characteristics questionnaire.

†Unless stated otherwise.
