# Supplementary material
Source: PubMed Central journal article supplement (PMC1373712)
Supplement: cmaj_174_3_313__2.pdf [file cmaj_174_3_313__2.pdf]

**Appendix 2: Markers of resource utilization in the emergency department by patient visit**

| Marker                                   | Patient visit; mean (SD)        |                           | Difference (95% CI)   |
|------------------------------------------|---------------------------------|---------------------------|-----------------------|
|                                          | Intervention<br><i>n</i> = 1048 | Control<br><i>n</i> = 974 |                       |
| Tests requested per visit, no.*          | 6.5 (6.5)                       | 7.0 (6.8)                 | -0.37 (-0.96 to 0.21) |
| Consultations requested per visit, no.   | 1.2 (0.8)                       | 1.2 (0.9)                 | 0.03 (-0.05 to 0.10)  |
| Length of stay, mean, h                  | 10.3 (10.17)                    | 10.4 (10.56)              | -0.07 (-0.98 to 0.83) |
| Length of stay in log scale,†<br>mean, h | 1.94 (0.88)                     | 1.93 (0.9)                | 0.012 (-0.07 to 0.09) |

Note: SD = standard deviation, CI = confidence interval.

\*Blood tests, imaging, urinalysis and electrocardiography.

†The length of stay is in log scale because of skewed distribution.
