# Supplementary material
Source: PubMed Central journal article supplement (PMC1373712)
Supplement: cmaj_174_3_313__3.pdf [file cmaj_174_3_313__3.pdf]

**Appendix 3:** Markers of resource utilization in family physician offices at follow-up visits by patient visit

| Marker                                      | Patient visit; no. (%)          |                           | <i>p</i> value |
|---------------------------------------------|---------------------------------|---------------------------|----------------|
|                                             | Intervention<br><i>n</i> = 1048 | Control<br><i>n</i> = 974 |                |
| Tests requested,* no.                       |                                 |                           |                |
| 0                                           | 998 (95.2)                      | 928 (95.3)                | —              |
| 1                                           | 23 (2.2)                        | 29 (3.0)                  | 0.4745         |
| ≥ 2                                         | 27 (2.6)                        | 17 (1.7)                  | —              |
| Consultations requested, no.                |                                 |                           |                |
| 0                                           | 995 (94.9)                      | 918 (94)                  | —              |
| 1                                           | 45 (4.3)                        | 48 (4.9)                  | 0.4102         |
| ≥ 2                                         | 8 (0.8)                         | 8 (0.8)                   | —              |
| Tests duplicated from ED visit,* no.        | 24 (2.3)                        | 22 (2.3)                  | 0.9366         |
| Consultations duplicated from ED visit, no. | 20 (1.9)                        | 8 (0.8)                   | 0.049          |

Note: ED = emergency department.

\*Blood tests, imaging, urinalysis and electrocardiography.
